# Supplementary material for: Educational virtual reality videos in improving bowel preparation quality and satisfaction of outpatients undergoing colonoscopy: protocol of a randomised controlled trial
Source: PubMed Central journal article supplement — BMJ Open. 2019 Aug 20;9(8):e029483. doi: 10.1136/bmjopen-2019-029483 (PMC6707650; doi:10.1136/bmjopen-2019-029483), 2019-08-20
Supplement: bmjopen-2019-029483.draft_revisions.pdf [file bmjopen-2019-029483.draft_revisions.pdf]

# BMJ Open

BMJ Open is committed to open peer review. As part of this commitment we make the peer review history of every article we publish publicly available.

When an article is published we post the peer reviewers' comments and the authors' responses online. We also post the versions of the paper that were used during peer review. These are the versions that the peer review comments apply to.

The versions of the paper that follow are the versions that were submitted during the peer review process. They are not the versions of record or the final published versions. They should not be cited or distributed as the published version of this manuscript.

BMJ Open is an open access journal and the full, final, typeset and author-corrected version of record of the manuscript is available on our site with no access controls, subscription charges or pay-per-view fees (<http://bmjopen.bmj.com>).

If you have any questions on BMJ Open's open peer review process please email [info.bmjopen@bmj.com](mailto:info.bmjopen@bmj.com)

# BMJ Open

## **Educational Virtual Reality Videos in Improving Bowel Preparation Quality and Satisfaction of Outpatients Undergoing Colonoscopy: Protocol of A Randomized Controlled Trial**

|                               |                                                                                                                                                                                                                                                                                                                                                                                 |
|-------------------------------|---------------------------------------------------------------------------------------------------------------------------------------------------------------------------------------------------------------------------------------------------------------------------------------------------------------------------------------------------------------------------------|
| Journal:                      | <i>BMJ Open</i>                                                                                                                                                                                                                                                                                                                                                                 |
| Manuscript ID                 | bmjopen-2019-029483                                                                                                                                                                                                                                                                                                                                                             |
| Article Type:                 | Protocol                                                                                                                                                                                                                                                                                                                                                                        |
| Date Submitted by the Author: | 28-Jan-2019                                                                                                                                                                                                                                                                                                                                                                     |
| Complete List of Authors:     | Zhao, Yi; Peking Union Medical College Hospital, Gastroenterology<br>Xie, Feng; McMaster University, Department of Clinical Epidemiology & Biostatistics<br>Bai, Xiaoyin; Peking Union Medical College Hospital, Gastroenterology<br>Yang, Aiming; Peking Union Medical College Hospital, Gastroenterology<br>Wu, Dong; Peking Union Medical College Hospital, Gastroenterology |
| Keywords:                     | Colonoscopy, Bowel preparation, Patient education, Virtual reality                                                                                                                                                                                                                                                                                                              |
|                               |                                                                                                                                                                                                                                                                                                                                                                                 |

SCHOLARONE™  
Manuscripts

1  
2  
3  
4 **Educational Virtual Reality Videos in Improving Bowel Preparation**  
5  
6  
7 **Quality and Satisfaction of Outpatients Undergoing Colonoscopy:**  
8  
9 **Protocol of A Randomized Controlled Trial**  
10  
11

12 Zhao Yi<sup>1</sup>, Feng Xie<sup>2,3</sup>, Bai Xiaoyin<sup>1</sup>, Yang Aiming<sup>1</sup>, Wu Dong<sup>1\*</sup>  
13  
14

15 **Affiliation:**  
16

- 17 1. Department of Gastroenterology, Peking Union Medical College Hospital,  
18 Chinese Academy of Medical Sciences, Beijing, China  
19 2. Department of Health Research Methods, Evidence and Impact, McMaster  
20 University, Hamilton, Canada  
21 3. Centre for Health Economics and Policy Analysis, McMaster University,  
22 Hamilton, Canada  
23

24 \*Corresponding author: Wu Dong, wudong061002@aliyun.com  
25  
26

27  
28 word count: 3024  
29  
30  
31  
32  
33  
34  
35  
36  
37  
38  
39  
40  
41  
42  
43  
44  
45  
46  
47  
48  
49  
50  
51  
52  
53  
54  
55  
56  
57  
58  
59  
60

## ABSTRACT

**Introduction** Colonoscopy is the reference method in screening and diagnosis of colorectal neoplasm, but its efficacy is closely related to the quality of bowel preparation. Poor patient compliance is a major risk factor for inadequate bowel preparation likely due to poor patient education. Such an education is usually provided via either oral or written instructions by clinicians. However, multiple education methods, like smartphone applications, have been proved useful in aiding patients through bowel preparation. Also, it was reported that a large proportion of patients feel anxious before colonoscopy. Virtual reality is a novel method to educate patients and provides them with an immersive experience. Theoretically, it can help patients better prepared for bowel preparation and colonoscopy. However, no prospective studies have assessed the role of this novel technology in patient education before colonoscopy. We hypothesize that VR videos can improve bowel preparation quality and reduce pre-procedure anxiety.

**Methods/Design** The trial is a prospective, randomized, single-blinded, single-center trial. Outpatients who were scheduled to undergo colonoscopy for screening or diagnostic purposes for the first time will be randomized to receive either conventional patient education or the conventional methods plus VR videos. 322 patients will be enrolled from the Peking Union Medical College Hospital. The primary endpoint is the quality of bowel preparation, measured by the Boston bowel preparation score. Secondary endpoints include polyp detection rate, adenoma detection rate, cecal intubation rate, patient compliance to complete bowel cleansing, withdrawal time, pre-procedure anxiety, overall satisfaction and willingness for the next colonoscopy.

**Ethics and dissemination** The study has been approved by the institutional review board of the Peking Union Medical College Hospital (No. ZS-1647). The results of this trial will be published in an open access way and disseminated among gastrointestinal physicians and endoscopists.

**Trial registration** This trial has been registered at the ClinicalTrials (NCT03667911)

**Keywords:** Colonoscopy, Bowel preparation, Patient education, Virtual reality

### **Strengths and limitations of this study**

- This is a randomized controlled two-arm single-blinded trial providing evidence concerning the effectiveness of virtual reality education in improving the quality of bowel preparation and reducing pre-procedure anxiety.
- Patients will not bear additional risks in this trial but will possibly have better results of colonoscopy.
- This is a single-center trial.

## **Introduction**

Colonoscopy is the reference method in screening and diagnosis of colorectal cancer, and its efficacy is closely related to the quality of bowel preparation, requiring consuming purgatives and restricting diet[4,5]. Optimal bowel preparation can lead to

1  
2  
3 a higher adenoma detection rate[6]. However, it has been reported that approximately  
4 30% patients fail to achieve adequate bowel preparation in Asian patients[7].

5  
6 Inadequate bowel preparation is mainly due to poor patient compliance[8], which  
7 closely relates to patient education[9].

8  
9 In most occasions, such an education is offered only once through either oral or  
10 written instructions by clinicians during an initial appointment. Strong evidence has  
11 shown that extensive education methods, including booklet[10], telephone[11,12],  
12 message reminders[13,14], smartphone applications[15,16], social media[17], and  
13 online videos[18-21], have been used to aid patient education with variable  
14 effectiveness. These methods can increase patient motivation, which can improve the  
15 bowel preparation quality[22]. Also, it was reported that a large proportion of patients  
16 feel anxious before colonoscopy and pre-procedure information help reduce the  
17 anxiety[23]. Virtual reality (VR) is an interactive computer-generated experience  
18 taking place within a simulated environment. It will provide patients with an  
19 immersive experience, which is believed to be able to help patients better prepared for  
20 both bowel preparation and colonoscopy. However, to the best of our knowledge, no  
21 prospective studies have assessed the role of this novel technology in patient  
22 education before colonoscopy. We hypothesize that compared with conventional  
23 patient education methods, VR videos can improve the quality of bowel preparation  
24 thorough enhancing patient motivation and compliance, reduce pre-procedure anxiety,  
25 and improve patient experience during conscious colonoscopy.  
26  
27  
28  
29  
30

## 31 32 **Methods**

### 33 34 **Design**

35 The trial is a prospective, randomized, controlled, single-blinded, single-center trial.  
36 Outpatients who are arranged to undergo a conscious colonoscopy (i.e., without  
37 sedation) for screening or diagnostic purposes for the first time will be randomized to  
38 the control group or the VR intervention group. This study aims to explore whether  
39 VR videos can improve the bowel preparation quality, increase patient adherence and  
40 satisfaction, and reduce pre-procedure anxiety, compared with conventional patient  
41 education methods. Figure 1 summarises the design of the trial and each of the trials  
42 aspects is described in detail below.  
43  
44  
45  
46

47 Figure 1. Trial design.

### 48 49 **Study Population**

50 All patients who have the indications for colonoscopy screening presenting to Peking  
51 Union Medical College Hospital, a tertiary hospital in Beijing, China, will be assessed  
52 for eligibility during the appointment, starting from Sep 15<sup>th</sup>, 2018 and estimated to  
53 complete in April 2019.  
54  
55  
56

### 57 58 **Inclusion criteria**

- 1  
2  
3  
4  
5  
6  
7  
8  
9  
10  
11  
12  
13  
14
- Outpatients indicated for elective colonoscopy: 1) For screening purposes: asymptomatic patients with average or high risk for colorectal cancer[1]; 2) For diagnostic purposes: patients presented with abnormal imaging or lower gastrointestinal symptoms including bloody stool, chronic diarrhea and abdominal pain[2]
  - No prior colonoscopy
  - Age 18-75 years
  - Written informed consent

### 15 **Exclusion criteria**

16 Patient who meet any of the following criteria will be excluded:

- 17  
18  
19  
20  
21  
22  
23  
24  
25  
26  
27  
28  
29
- Contradictions for colonoscopy
  - History of bowel surgery
  - Diagnosed with severe comorbidities (e.g. ascites, congestive heart failure, chronic renal failure, coronary artery disease within the last six months)
  - On constipation, laxatives, or anti-diarrheal medications
  - Pregnant
  - Severe constipation (<3 bowel movement/week)
  - Inflammatory bowel disease (IBD)
  - Unable to watch VR videos (e.g., blindness)

### 30 **Randomization and Assignments**

31  
32  
33  
34  
35  
36  
37  
38  
39  
40

After the colonoscopy is scheduled and written informed consent is obtained, patients will be randomized with 1:1 ratio to the conventional education method or the conventional education plus VR video. A computerized random number table will be used in randomization. The randomization process is performed by a physician who will also provide education on bowel preparation and will not be involved in performing procedures. All endoscopists in this trial will be unaware of the allocation.

### 41 **General bowel preparation requirement[24]**

42 Diet restriction: Low-residue diet until the evening on the day before colonoscopy

43 Colon cleansing regimens:

44  
45 The first dose: 2L laxatives (polyethyleneglycol) used on the evening of the day before colonoscopy (after dinner)

46  
47 The second dose: 1L laxatives used 3-4 hours before colonoscopy

### 48 49 **The control group: conventional patient education methods**

50  
51  
52  
53  
54  
55  
56  
57  
58

Patients in the control group will only receive routine patient education on bowel preparation of colonoscopy. A well-trained nurse or a doctor will provide oral instructions on bowel preparation (including definition, significance, correct steps as well as dietary limitations). Written instructions are also provided to patients to take away, which have the same contents as the oral instructions.

### 59 **The intervention group: conventional methods plus VR videos**

1  
2  
3 In addition to the routine patient education methods mentioned above, patients in the  
4 intervention group will watch a VR video for about 6 minutes. Videos will give  
5 instructions on bowel preparation step by step, emphasize on points for attention  
6 before and after the procedure, and give brief introductions to the procedures of  
7 colonoscopy and a to-do list after a therapeutic procedure (e.g., polypectomy).  
8  
9

### 10 11 **Primary endpoint**

12 The primary endpoint is the quality of bowel preparation measured by the Boston  
13 bowel preparation score (BBPS) evaluated during the procedure. In BBPS, 3 broad  
14 regions of colon right (including the cecum and ascending colon; transverse,  
15 including the hepatic and splenic flexures; and left, including the descending colon,  
16 sigmoid, and rectum) will be given a score from 0 to 3. 0 means unprepared colon  
17 segment with mucosa not seen due to solid stool that cannot be cleared and 3 means  
18 Entire mucosa of colon segment seen well with no residual staining, small fragments  
19 of stool or opaque liquid. Endoscopists are blinded to the grouping of patients.  
20  
21  
22  
23

### 24 **Secondary endpoints**

25 We also hypothesize that VR videos can increase patient motivation and deepen their  
26 understanding of colonoscopy, which is likely to increase the detection rate of  
27 abnormality, reduce anxiety, and improve patient experiences. We set secondary  
28 endpoints as follows:  
29

- 30 • Polyp detection rate (PDR).
  - 31 • Adenoma detection rate (ADR).
  - 32 • Cecal intubation rate.
  - 33 • Patient compliance with bowel preparation (rate of complying with diet restriction  
34 and laxatives use).
  - 35 • Withdrawal time.
  - 36 • Pre-procedure anxiety (measured by self-rated sleep quality before the procedure).
  - 37 • Overall satisfaction with bowel preparation.
  - 38 • Willingness to take another colonoscopy if indicated.
- 39  
40  
41  
42  
43

### 44 **Sample size calculation**

45 The sample size estimation was based on the test of 2 independent proportions with a  
46 2-sided  $\alpha=0.05$  and a power probability of 90% ( $\beta=0.1$ ). The rate of adequate  
47 preparation (a score  $\geq 2$  for all regions) in the control group is 70%[3], and we assumed  
48 an increase of 15% for the VR Group. We calculated that at least 161 evaluable  
49 patients would be required per group for the study to achieve this power.  
50  
51

### 52 **Data collection**

53 Data collection will be performed by using a standardized case report form during the  
54 appointment and on the day of colonoscopy.  
55  
56  
57

### 58 **Descriptive statistics**

1  
2  
3 For categorical data, frequencies will be presented. Quantitative data will be presented  
4 as the mean and standard deviation or median and interquartile range. Baseline  
5 characteristics (all prior to randomization) are: age, sex, body mass index, education  
6 level, annual personal income, living habits (including smoking, drinking and  
7 exercise), dietary habit (vegetarianism/meatatarian/balanced diet), past medical  
8 history of comorbidity (hypertension, diabetes mellitus, bronchitis, asthma,  
9 congestive heart failure, chronic renal failure, coronary artery disease, IBD,  
10 malignancy), symptoms (chronic diarrhea, constipation, mucous stool or bloody stool),  
11 family history of colorectal cancer or specific inherited syndromes.  
12  
13  
14  
15

### 16 **Analyses**

17 All data will be analyzed according to the intention-to-treat approach in which all  
18 randomized patients are included. Occurrences of the primary and secondary  
19 endpoints are compared between the two groups. Results are presented as difference  
20 in two proportions. A two-tailed  $P < 0.05$  is considered statistically significant.  
21  
22  
23

### 24 **Trial Mangement**

25 A steering committee will manage the trial. Screening and recruitment will be  
26 reviewed at monthly meetings. An independent data and safety monitoring committee  
27 (DSMC) will meet regularly to ensure patient safety and data quality. DSMC will  
28 verify all primary and secondary endpoints as well as at least 10% of data in case  
29 report forms against on-site source data. Discrepancies detected by the committee will  
30 be resolved through a consensus by two investigators unaware of the study group  
31 assignment and not involved in patient care. Relevant clinical and radiological data  
32 submitted to the steering committee will facilitate duplicate blinded outcome  
33 adjudication.  
34  
35  
36  
37

### 38 **Termination of the trial**

39 An interim-analysis will be conducted on the primary endpoint when 25%, 50%, and  
40 75% of patients have been enrolled. The interim-analysis is performed by an  
41 independent statistician, blinded for the treatment allocation. The statistician will  
42 report to the independent DSMC. The DSMC will have unrestricted access to all data  
43 and will discuss the results of the intention-to-treat analysis with the steering  
44 committee in a joint meeting. The steering committee decides on the continuation of  
45 the trial and will report to the central ethics committee. The Peto approach is used to  
46 terminate the trial when the intervention group has a significant benefit from the  
47 addition of VR to the patient education methods using symmetric stopping boundaries  
48 at  $P < 0.001$ . The trial will not be stopped in case of futility unless the DSMC during  
49 safety monitoring advises otherwise. In this case, DSMC will discuss potential  
50 stopping for futility with the trial steering committee.  
51  
52  
53  
54  
55

### 56 **Safety**

57 The DSMC will monitor the progress of the trial by examining safety variables  
58 quarterly. This evaluation is based on unblinded data, in the presence of the study  
59  
60



1  
2  
3 coordinator when DSMC requires details of the study. After the full explanation of  
4 the data is presented, the study coordinator is dismissed, and the DSMC discusses the  
5 consequences of the data presented. Adverse events are defined as "any undesirable  
6 experience occurring to a subject during a clinical trial, whether or not considered  
7 related to the intervention," such as a sense of dizziness after watching VR videos. All  
8 participating physicians will be asked to report any potential adverse events. These  
9 adverse events will be listed and discussed with the DSMC. The outcome of the  
10 meeting of the DSMC will be discussed with the trial steering committee. The  
11 outcome will also be sent to our hospital institutional review board (IRB). The DSMC  
12 will evaluate the data of the deceased patients for the cause of death, and possible trial  
13 related severe adverse events.  
14  
15  
16  
17  
18

## 19 **Discussions**

20  
21 The trial is aimed to explore whether VR videos can improve the bowel preparation  
22 quality through increasing patient adherence and experience, reduce pre-procedure  
23 anxiety, compared with the conventional patient education methods. To date, there  
24 have been several studies demonstrating that extensive patient education  
25 methods[10-21] are effective in enhancing the bowel preparation quality. However,  
26 there is a lack of evidence on the effect of VR videos , a novel technology which can  
27 provide patients with immersive experiences simulating the process of bowel  
28 preparation and colonoscopy that cannot be achieved by conventional education  
29 methods. It is likely that VRs will offer an effective means of educating patients  
30 before colonoscopy, leading to better results of the procedure.  
31  
32  
33  
34  
35

## 36 **Ethics and Dissemination**

37  
38 We will conduct the study following the declaration of Helsinki. The IRB of the  
39 Peking Union Medical College Hospital approved the protocol on the 24<sup>th</sup> of July 2018  
40 (No. ZS-1647). We will obtain Informed consent from each participating patient in  
41 oral and written form before randomization. We will disseminate our results to the  
42 medical circle and will publish our results via open access.  
43  
44  
45

## 46 **Trial Status**

47  
48 We registered this trial in the ClinicalTrials on 20 August 2018 with identification  
49 number NCT03667911. The first patient was randomized on the 15<sup>th</sup> of September  
50 2018. To date, 62 patients have been randomized, and enrollment is on schedule.  
51  
52  
53

## 54 **Reference**

55  
56 1. Wolf AM, Fontham ET, Church TR, et al. Colorectal cancer screening for  
57 average-risk adults: 2018 guideline update from the American Cancer Society[J]. CA:  
58 A Cancer Journal for Clinicians, 2018, 68(4):250-281.  
59  
60

2. Rex DK, Schoenfeld PS, Cohen J, et al. Quality indicators for colonoscopy[J]. *American Journal of Gastroenterology*, 2015, 81(1):31-53.
3. Back SY, Kim HG, Ahn EM, et al. Impact of patient audio-visual re-education through a smartphone on quality of bowel preparation before colonoscopy; a single-blinded randomized study[J]. *Gastrointestinal Endoscopy*, 2017:S0016510717322691.
4. Johnson DA, Barkun AN, Cohen LB, et al. Optimizing adequacy of bowel cleansing for colonoscopy: recommendations from the U.S. multi-society task force on colorectal cancer. *Gastrointest Endosc* 2014, 80:543.
5. ASGE Standards of Practice Committee, Saltzman JR, Cash BD, et al. Bowel preparation before colonoscopy. *Gastrointest Endosc* 2015, 81:781.
6. Pontone S, Hassan C, Maselli R, et al. Multiple, zonal and multi-zone adenoma detection rates according to quality of cleansing during colonoscopy. *United European Gastroenterology Journal*, 2016, 4(6):778–783.
7. Woo DH, Kim KO, Jeong DE, et al. Prospective analysis of factors associated with inadequate bowel preparation for colonoscopy in actual clinical practice. *Intestinal Research*, 2018, 16(2):293–298.
8. Nguyen DL, Wieland M. Risk factors predictive of poor quality preparation during average risk colonoscopy screening: the importance of health literacy. *J Gastrointest Liver Dis* 2010; 19:369–72.
9. Rosenfeld G, Krygier D, Enns R, et al. The impact of patient education on the quality of inpatient bowel preparation for colonoscopy[J]. *Canadian Journal of Gastroenterology & Hepatology*, 2010, 24(9):543-546.
10. Spiegel BMR, Talley J, Shekelle P, et al. Development and validation of a novel patient educational booklet to enhance colonoscopy preparation. *The American Journal of Gastroenterology*, 2011,106(5):875–883.
11. Liu X, Luo H, Zhang L, et al. Telephone-based re-education on the day before colonoscopy improves the quality of bowel preparation and the polyp detection rate: a prospective, colonoscopist-blinded, randomised, controlled study. *Gut*, 2013, 63(1):125–130.
12. Sondhi AR, Kurlander JE, Waljee AK, Saini SD. A telephone-based education program improves bowel preparation quality in patients undergoing outpatient colonoscopy. *Gastroenterology*, 2015,148(3):657–658.
13. Park J, Kim TO, Lee NY, et al. The Effectiveness of Short Message Service to Assure the Preparation-to-Colonoscopy Interval before Bowel Preparation for Colonoscopy. *Gastroenterology Research and Practice*, 2015, 2015(7):628049–8.
14. Walter B, Klare P, Strehle K, et al. Improving the quality and acceptance of colonoscopy preparation by reinforced patient education with short message service: results from a randomized, multicenter study (PERICLES-II). *Gastrointestinal Endoscopy*, 2018.
15. Lorenzo-Zúñiga V, Moreno de Vega V, Marín I, Barberá M, Boix J. Improving the quality of colonoscopy bowel preparation using a smart phone application: a randomized trial. *Digestive Endoscopy : Official Journal of the Japan Gastroenterological Endoscopy Society*, 2015, 27(5):590–595.

- 1  
2  
3 16. Cho J, Lee S, Shin JA, Kim JH, Lee HS. The Impact of Patient Education with a  
4 Smartphone Application on the Quality of Bowel Preparation for Screening  
5 Colonoscopy. *Clinical Endoscopy*, 2017, 50(5):479–485.  
6  
7 17. Wang SL, Wang Q, Yao J, et al. Effect of WeChat and short message service on  
8 bowel preparation: an endoscopist-blinded, randomized controlled trial. *European*  
9 *Journal of Gastroenterology & Hepatology*, 2018:1.  
10  
11 18. Garg S, Girotra M, Chandra L, et al. Improved Bowel Preparation with  
12 Multimedia Education in a Predominantly African-American Population: A  
13 Randomized Study. *Diagnostic and Therapeutic Endoscopy*, 2016,  
14 2016(12):2072401–7.  
15  
16 19. Park JS, Kim MS, Kim H, et al. A randomized controlled trial of an educational  
17 video to improve quality of bowel preparation for colonoscopy. *BMC*  
18 *Gastroenterology*, 2016, 16(1):64.  
19  
20 20. Back SY, Kim HG, Ahn EM, et al. Impact of patient audiovisual re-education via  
21 a smartphone on the quality of bowel preparation before colonoscopy: a  
22 single-blinded randomized study. *Gastrointestinal Endoscopy*, 2018, 87(3):789–  
23 799.e4.  
24  
25 21. Pillai A, Menon R, Ousteky D, & Ahmad A. Educational Colonoscopy Video  
26 Enhances Bowel Preparation Quality and Comprehension in an Inner City Population.  
27 *Journal of Clinical Gastroenterology*, 2018, 52(6):515–518.  
28  
29 22. Serper M, Gawron AJ, Smith SG, et al. Patient Factors that Affect Quality of  
30 Colonoscopy Preparation[J]. *Clinical Gastroenterology & Hepatology the Official*  
31 *Clinical Practice Journal of the American Gastroenterological Association*, 2014,  
32 12(3):451-457.  
33  
34 23. Yang C, Sriranjana V, Abou-Setta AM, Poluha W, Walker JR, & Singh H. Anxiety  
35 Associated with Colonoscopy and Flexible Sigmoidoscopy: A Systematic Review.  
36 *The American Journal of Gastroenterology*, 2018, 59(6 Pt 1):366.  
37  
38 24. Johnson DA, Barkun AN, Cohen LB, et al. Optimizing adequacy of bowel  
39 cleansing for colonoscopy: recommendations from the U.S. Multi-Society Task Force  
40 on Colorectal Cancer[J]. *Gastroenterology*, 2014, 80(4):543-562.  
41  
42  
43

### 44 **Authors' contributions**

45  
46 ZY is responsible for designing the trial, drafting the protocol, reviewing and final  
47 approval.

48 FX contributes to improving the methodology of this trial.

49 AY contributes to the design and managing this trial.

50  
51 WD is the corresponding author, responsible for designing and managing the trial,  
52 drafting the protocol, reviewing and final approval.  
53  
54  
55

### 56 **Funding Statement**

57  
58 This research received no specific grant from any funding agency in public,  
59 commercial or not-for-profit sectors.  
60

1  
2  
3  
4  
5 **Competing interests statement**  
6

7 None.  
8  
9  
10  
11  
12  
13  
14  
15  
16  
17  
18  
19  
20  
21  
22  
23  
24  
25  
26  
27  
28  
29  
30  
31  
32  
33  
34  
35  
36  
37  
38  
39  
40  
41  
42  
43  
44  
45  
46  
47  
48  
49  
50  
51  
52  
53  
54  
55  
56  
57  
58  
59  
60

For peer review only

1  
2  
3  
4  
5  
6  
7  
8  
9  
10  
11  
12  
13  
14  
15  
16  
17  
18  
19  
20  
21  
22  
23  
24  
25  
26  
27  
28  
29  
30  
31  
32  
33  
34  
35  
36  
37  
38  
39  
40  
41  
42  
43  
44  
45  
46  
47  
48  
49  
50  
51  
52  
53  
54  
55  
56  
57  
58  
59  
60

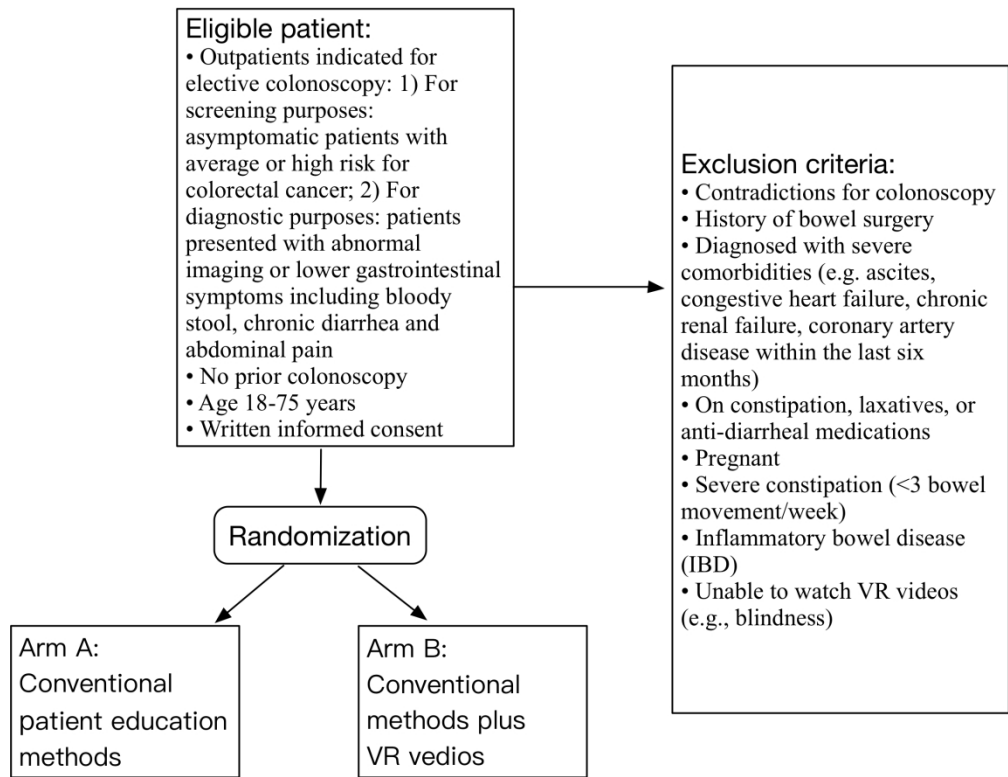

Trial design.

207x159mm (300 x 300 DPI)

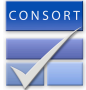

## CONSORT 2010 checklist of information to include when reporting a randomised trial\*

| Section/Topic                    | Item No | Checklist item                                                                                                                                                                              | Reported on page No |
|----------------------------------|---------|---------------------------------------------------------------------------------------------------------------------------------------------------------------------------------------------|---------------------|
| <b>Title and abstract</b>        |         |                                                                                                                                                                                             |                     |
|                                  | 1a      | Identification as a randomised trial in the title                                                                                                                                           | 1                   |
|                                  | 1b      | Structured summary of trial design, methods, results, and conclusions (for specific guidance see CONSORT for abstracts)                                                                     | 2                   |
| <b>Introduction</b>              |         |                                                                                                                                                                                             |                     |
| Background and objectives        | 2a      | Scientific background and explanation of rationale                                                                                                                                          | 3                   |
|                                  | 2b      | Specific objectives or hypotheses                                                                                                                                                           | 3                   |
| <b>Methods</b>                   |         |                                                                                                                                                                                             |                     |
| Trial design                     | 3a      | Description of trial design (such as parallel, factorial) including allocation ratio                                                                                                        | 3                   |
|                                  | 3b      | Important changes to methods after trial commencement (such as eligibility criteria), with reasons                                                                                          | N/A                 |
| Participants                     | 4a      | Eligibility criteria for participants                                                                                                                                                       | 4                   |
|                                  | 4b      | Settings and locations where the data were collected                                                                                                                                        | 5                   |
| Interventions                    | 5       | The interventions for each group with sufficient details to allow replication, including how and when they were actually administered                                                       | 4-5                 |
| Outcomes                         | 6a      | Completely defined pre-specified primary and secondary outcome measures, including how and when they were assessed                                                                          | 5                   |
|                                  | 6b      | Any changes to trial outcomes after the trial commenced, with reasons                                                                                                                       | N/A                 |
| Sample size                      | 7a      | How sample size was determined                                                                                                                                                              | 5                   |
|                                  | 7b      | When applicable, explanation of any interim analyses and stopping guidelines                                                                                                                | 6                   |
| <b>Randomisation:</b>            |         |                                                                                                                                                                                             |                     |
| Sequence generation              | 8a      | Method used to generate the random allocation sequence                                                                                                                                      | 4                   |
|                                  | 8b      | Type of randomisation; details of any restriction (such as blocking and block size)                                                                                                         | 4                   |
| Allocation concealment mechanism | 9       | Mechanism used to implement the random allocation sequence (such as sequentially numbered containers), describing any steps taken to conceal the sequence until interventions were assigned | 4                   |
| Implementation                   | 10      | Who generated the random allocation sequence, who enrolled participants, and who assigned participants to interventions                                                                     | 4                   |
| Blinding                         | 11a     | If done, who was blinded after assignment to interventions (for example, participants, care providers, those                                                                                | 4                   |

|    |                          |                                                             |                                                                                                                  |
|----|--------------------------|-------------------------------------------------------------|------------------------------------------------------------------------------------------------------------------|
| 1  |                          | assessing outcomes) and how                                 |                                                                                                                  |
| 2  | 11b                      | If relevant, description of the similarity of interventions | N/A                                                                                                              |
| 3  | Statistical methods      | 12a                                                         | Statistical methods used to compare groups for primary and secondary outcomes                                    |
| 4  |                          | 12b                                                         | Methods for additional analyses, such as subgroup analyses and adjusted analyses                                 |
| 5  |                          |                                                             |                                                                                                                  |
| 6  | <b>Results</b>           |                                                             |                                                                                                                  |
| 7  | Participant flow (a      | 13a                                                         | For each group, the numbers of participants who were randomly assigned, received intended treatment, and         |
| 8  | diagram is strongly      |                                                             | were analysed for the primary outcome                                                                            |
| 9  | recommended)             | 13b                                                         | For each group, losses and exclusions after randomisation, together with reasons                                 |
| 10 | Recruitment              | 14a                                                         | Dates defining the periods of recruitment and follow-up                                                          |
| 11 |                          | 14b                                                         | Why the trial ended or was stopped                                                                               |
| 12 | Baseline data            | 15                                                          | A table showing baseline demographic and clinical characteristics for each group                                 |
| 13 | Numbers analysed         | 16                                                          | For each group, number of participants (denominator) included in each analysis and whether the analysis was      |
| 14 |                          |                                                             | by original assigned groups                                                                                      |
| 15 | Outcomes and             | 17a                                                         | For each primary and secondary outcome, results for each group, and the estimated effect size and its            |
| 16 | estimation               |                                                             | precision (such as 95% confidence interval)                                                                      |
| 17 |                          | 17b                                                         | For binary outcomes, presentation of both absolute and relative effect sizes is recommended                      |
| 18 | Ancillary analyses       | 18                                                          | Results of any other analyses performed, including subgroup analyses and adjusted analyses, distinguishing       |
| 19 |                          |                                                             | pre-specified from exploratory                                                                                   |
| 20 | Harms                    | 19                                                          | All important harms or unintended effects in each group (for specific guidance see CONSORT for harms)            |
| 21 |                          |                                                             |                                                                                                                  |
| 22 | <b>Discussion</b>        |                                                             |                                                                                                                  |
| 23 | Limitations              | 20                                                          | Trial limitations, addressing sources of potential bias, imprecision, and, if relevant, multiplicity of analyses |
| 24 | Generalisability         | 21                                                          | Generalisability (external validity, applicability) of the trial findings                                        |
| 25 | Interpretation           | 22                                                          | Interpretation consistent with results, balancing benefits and harms, and considering other relevant evidence    |
| 26 |                          |                                                             |                                                                                                                  |
| 27 | <b>Other information</b> |                                                             |                                                                                                                  |
| 28 | Registration             | 23                                                          | Registration number and name of trial registry                                                                   |
| 29 | Protocol                 | 24                                                          | Where the full trial protocol can be accessed, if available                                                      |
| 30 | Funding                  | 25                                                          | Sources of funding and other support (such as supply of drugs), role of funders                                  |
| 31 |                          |                                                             |                                                                                                                  |
| 32 |                          |                                                             |                                                                                                                  |
| 33 |                          |                                                             |                                                                                                                  |
| 34 |                          |                                                             |                                                                                                                  |
| 35 |                          |                                                             |                                                                                                                  |
| 36 |                          |                                                             |                                                                                                                  |
| 37 |                          |                                                             |                                                                                                                  |
| 38 |                          |                                                             |                                                                                                                  |
| 39 |                          |                                                             |                                                                                                                  |
| 40 |                          |                                                             |                                                                                                                  |
| 41 |                          |                                                             |                                                                                                                  |
| 42 |                          |                                                             |                                                                                                                  |
| 43 |                          |                                                             |                                                                                                                  |
| 44 |                          |                                                             |                                                                                                                  |
| 45 |                          |                                                             |                                                                                                                  |
| 46 |                          |                                                             |                                                                                                                  |

\*We strongly recommend reading this statement in conjunction with the CONSORT 2010 Explanation and Elaboration for important clarifications on all the items. If relevant, we also recommend reading CONSORT extensions for cluster randomised trials, non-inferiority and equivalence trials, non-pharmacological treatments, herbal interventions, and pragmatic trials. Additional extensions are forthcoming: for those and for up to date references relevant to this checklist, see [www.consort-statement.org](http://www.consort-statement.org).

# BMJ Open

## Educational Virtual Reality Videos in Improving Bowel Preparation Quality and Satisfaction of Outpatients Undergoing Colonoscopy: Protocol of A Randomized Controlled Trial

|                                 |                                                                                                                                                                                                                                                                                                                                                                                                                                                |
|---------------------------------|------------------------------------------------------------------------------------------------------------------------------------------------------------------------------------------------------------------------------------------------------------------------------------------------------------------------------------------------------------------------------------------------------------------------------------------------|
| Journal:                        | <i>BMJ Open</i>                                                                                                                                                                                                                                                                                                                                                                                                                                |
| Manuscript ID                   | bmjopen-2019-029483.R1                                                                                                                                                                                                                                                                                                                                                                                                                         |
| Article Type:                   | Protocol                                                                                                                                                                                                                                                                                                                                                                                                                                       |
| Date Submitted by the Author:   | 02-Jul-2019                                                                                                                                                                                                                                                                                                                                                                                                                                    |
| Complete List of Authors:       | Zhao, Yi; Peking Union Medical College Hospital, Gastroenterology<br>Xie, Feng; McMaster University, Health Research Methods, Evidence and Impact; McMaster University, Centre for Health Economics and Policy Analysis<br>Bai, Xiaoyin; Peking Union Medical College Hospital, Gastroenterology<br>Yang, Aiming; Peking Union Medical College Hospital, Gastroenterology<br>Wu, Dong; Peking Union Medical College Hospital, Gastroenterology |
| <b>Primary Subject Heading</b>: | Gastroenterology and hepatology                                                                                                                                                                                                                                                                                                                                                                                                                |
| Secondary Subject Heading:      | Evidence based practice                                                                                                                                                                                                                                                                                                                                                                                                                        |
| Keywords:                       | Colonoscopy, Bowel preparation, Patient education, Virtual reality                                                                                                                                                                                                                                                                                                                                                                             |
|                                 |                                                                                                                                                                                                                                                                                                                                                                                                                                                |

SCHOLARONE™  
Manuscripts



1  
2  
3  
4 **Educational Virtual Reality Videos in Improving Bowel Preparation**  
5  
6  
7 **Quality and Satisfaction of Outpatients Undergoing Colonoscopy:**  
8  
9 **Protocol of A Randomized Controlled Trial**  
10  
11

12 Zhao Yi<sup>1</sup>, Xie Feng<sup>2,3</sup>, Bai Xiaoyin<sup>1</sup>, Yang Aiming<sup>1</sup>, Wu Dong<sup>1\*</sup>  
13  
14

15  
16 **Affiliation:**

- 17  
18 1. Department of Gastroenterology, Peking Union Medical College Hospital,  
19 Chinese Academy of Medical Sciences, Beijing, China  
20  
21 2. Department of Health Research Methods, Evidence and Impact, McMaster  
22 University, Hamilton, Canada  
23  
24 3. Centre for Health Economics and Policy Analysis, McMaster University,  
25 Hamilton, Canada

26 \*Corresponding author: Wu Dong, wudong061002@aliyun.com  
27

28 word count: 3281  
29  
30  
31  
32  
33  
34  
35  
36  
37  
38  
39  
40  
41  
42  
43  
44  
45  
46  
47  
48  
49  
50  
51  
52  
53  
54  
55  
56  
57  
58  
59  
60

## ABSTRACT

**Introduction** Colonoscopy is the reference method in screening and diagnosis of colorectal neoplasm, but its efficacy is closely related to the quality of bowel preparation. Poor patient compliance is a major risk factor for inadequate bowel preparation likely due to poor patient education. Such an education is usually provided via either oral or written instructions by clinicians. However, multiple education methods, like smartphone applications, have been proved useful in aiding patients through bowel preparation. Also, it was reported that a large proportion of patients feel anxious before colonoscopy. Virtual reality is a novel method to educate patients and provides them with an immersive experience. Theoretically, it can help patients better prepared for bowel preparation and colonoscopy. However, no prospective studies have assessed the role of this novel technology in patient education before colonoscopy. We hypothesize that VR videos can improve bowel preparation quality and reduce pre-procedure anxiety.

**Methods/Design** The trial is a prospective, randomized, single-blinded, single-center trial. Outpatients who were scheduled to undergo colonoscopy for screening or diagnostic purposes for the first time will be randomized to receive either conventional patient education or the conventional methods plus VR videos. 322 patients will be enrolled from the Peking Union Medical College Hospital. The primary endpoint is the quality of bowel preparation, measured by the Boston bowel preparation score. Secondary endpoints include polyp detection rate, adenoma detection rate, cecal intubation rate, patient compliance to complete bowel cleansing, withdrawal time, pre-procedure anxiety, overall satisfaction and willingness for the next colonoscopy.

**Ethics and dissemination** The study has been approved by the institutional review board of the Peking Union Medical College Hospital (No. ZS-1647). The results of this trial will be published in an open access way and disseminated among gastrointestinal physicians and endoscopists.

**Trial registration** This trial has been registered at the ClinicalTrials (NCT03667911)

**Keywords:** Colonoscopy, Bowel preparation, Patient education, Virtual reality

### **Strengths and limitations of this study**

- This is a randomized controlled two-arm single-blinded trial providing evidence concerning the effectiveness of virtual reality education in improving the quality of bowel preparation and reducing pre-procedure anxiety.
- Patients will not bear additional risks in this trial but will possibly have better results of colonoscopy.
- This is a single-center trial.

## **Introduction**

Colonoscopy is the reference method in screening and diagnosis of colorectal cancer, and its efficacy is closely related to the quality of bowel preparation, requiring consuming purgatives and restricting diet[1,2]. Optimal bowel preparation can lead to

1  
2  
3 a higher adenoma detection rate[3]. However, it has been reported that approximately  
4 30% patients fail to achieve adequate bowel preparation in Asian patients[4].

5 Inadequate bowel preparation is mainly due to poor patient compliance[5], which  
6 closely relates to patient education[6].

7  
8 In most occasions, such an education is offered only once through either oral or  
9 written instructions by clinicians during an initial appointment. Strong evidence has  
10 shown that extensive education methods, including booklet[7], telephone[8,9],  
11 message reminders[10,11], smartphone applications[12,13], social media[14], and  
12 online videos[15-18], have been used to aid patient education with variable  
13 effectiveness. These methods can increase patient motivation, which can improve the  
14 bowel preparation quality[19]. Also, it was reported that a large proportion of patients  
15 feel anxious before colonoscopy and pre-procedure information help reduce the  
16 anxiety[20]. Virtual reality (VR) is an interactive computer-generated experience  
17 taking place within a simulated environment. It will provide patients with an  
18 immersive experience, which is believed to be able to help patients better prepared for  
19 both bowel preparation and colonoscopy. However, to the best of our knowledge, no  
20 prospective studies have assessed the role of this novel technology in patient  
21 education before colonoscopy. We hypothesize that compared with conventional  
22 patient education methods, VR videos can improve the quality of bowel preparation  
23 thorough enhancing patient motivation and compliance, reduce pre-procedure anxiety,  
24 and improve patient experience during conscious colonoscopy.  
25  
26  
27  
28  
29  
30

## 31 32 **Methods**

### 33 **Design**

34 The trial is a prospective, randomized, controlled, single-blinded, single-center trial.  
35 Outpatients who are arranged to undergo a conscious colonoscopy (i.e., without  
36 sedation) for screening or diagnostic purposes for the first time will be randomized to  
37 the control group or the VR intervention group. This study aims to explore whether  
38 VR videos can improve the bowel preparation quality, increase patient adherence and  
39 satisfaction, and reduce pre-procedure anxiety, compared with conventional patient  
40 education methods. Figure 1 summarises the design of the trial and each of the trials  
41 aspects is described in detail below.  
42  
43  
44  
45  
46  
47

48 Figure 1. Trial design.

### 49 **Study Population**

50 All patients who have the indications for colonoscopy screening presenting to Peking  
51 Union Medical College Hospital, a tertiary hospital in Beijing, China, will be assessed  
52 for eligibility during the appointment, starting from Sep 15<sup>th</sup>, 2018 and estimated to  
53 complete in December 2019.  
54  
55  
56  
57

### 58 **Inclusion criteria**

- 1  
2  
3  
4  
5  
6  
7  
8  
9  
10  
11  
12  
13  
14
- Outpatients indicated for elective colonoscopy: 1) For screening purposes: asymptomatic patients with average or high risk for colorectal cancer[21]; 2) For diagnostic purposes: patients presented with abnormal imaging or lower gastrointestinal symptoms including bloody stool, chronic diarrhea and abdominal pain[22]
  - No prior colonoscopy
  - Age 18-75 years
  - Written informed consent

### 15 **Exclusion criteria**

16 Patient who meet any of the following criteria will be excluded:

- 17  
18  
19  
20  
21  
22  
23  
24  
25  
26  
27  
28  
29  
30
- Contradictions for colonoscopy
  - History of bowel surgery
  - Diagnosed with severe comorbidities (e.g. ascites, congestive heart failure, chronic renal failure, coronary artery disease within the last six months)
  - On constipation, laxatives, or anti-diarrheal medications
  - Pregnant
  - Severe constipation (<3 bowel movement/week)
  - Inflammatory bowel disease (IBD)
  - Unable to watch VR videos (e.g., blindness)

### 31 **Randomization and Assignments**

32 After the colonoscopy is scheduled and written informed consent is obtained, patients  
33 will be randomized with 1:1 ratio to the conventional education method or the  
34 conventional education plus VR video. A computerized random number table will be  
35 used in randomization. The randomization process is performed by a physician who  
36 will also provide education on bowel preparation and will not involved in performing  
37 procedures. All endoscopists in this trial will be unaware of the allocation.  
38  
39  
40

### 41 **General bowel preparation requirement**

42 Diet restriction: Low-residue diet until the evening on the day before colonoscopy

43 Colon cleansing regimens:

44 The first dose: 2L laxatives (polyethyleneglycol) used on the evening of the day  
45 before colonoscopy (after dinner)

46 The second dose: 1L laxatives used 3-4 hours before colonoscopy [23]  
47  
48  
49

### 50 **The control group: conventional patient education methods**

51 Patients in the control group will only receive routine patient education on bowel  
52 preparation of colonoscopy. A well-trained nurse or a doctor will provide oral  
53 instructions on bowel preparation (including definition, significance, correct steps as  
54 well as dietary limitations). Written instructions are also provided to patients to take  
55 away, which have the same contents as the oral instructions.  
56  
57  
58

### 59 **The intervention group: conventional methods plus VR videos**

60

1  
2  
3 In addition to the routine patient education methods mentioned above, patients in the  
4 intervention group will watch a VR video using a head-mounted 3D display (Figure 2)  
5 for about 6 minutes. Patients will be placed in the simulated settings of an operating  
6 room in the VR video. Four parts will be offered, including instructions on bowel  
7 preparation step by step, points for attention before and after the procedure, brief  
8 introductions to the specific procedures of colonoscopy and a to-do list after a  
9 therapeutic procedure (e.g., polypectomy). The device can track head movements and  
10 patients can familiarize themselves with the operating room and select the part they  
11 want to learn with head motion. Patients can only exit when they have finished all  
12 these four parts.  
13  
14  
15  
16

17 Figure 2. Head-mounted display for virtual reality videos.  
18  
19

### 20 **Primary endpoint**

21 The primary endpoint is the quality of bowel preparation measured by the Boston  
22 bowel preparation score (BBPS) evaluated during the procedure. In BBPS, 3 broad  
23 regions of colon right (including the cecum and ascending colon; transverse,  
24 including the hepatic and splenic flexures; and left, including the descending colon,  
25 sigmoid, and rectum) will be given a score from 0 to 3. 0 means unprepared colon  
26 segment with mucosa not seen due to solid stool that cannot be cleared and 3 means  
27 Entire mucosa of colon segment seen well with no residual staining, small fragments  
28 of stool or opaque liquid. Endoscopists are blinded to the grouping of patients.  
29  
30  
31  
32

### 33 **Secondary endpoints**

34 We also hypothesize that VR videos can increase patient motivation and deepen their  
35 understanding of colonoscopy, which is likely to increase the detection rate of  
36 abnormality, reduce anxiety, and improve patient experiences. We set secondary  
37 endpoints as follows:  
38

- 39 • Polyp detection rate (PDR).
  - 40 • Adenoma detection rate (ADR).
  - 41 • Cecal intubation rate.
  - 42 • Patient compliance with bowel preparation (rate of complying with diet restriction  
43 and laxatives use).
  - 44 • Withdrawal time.
  - 45 • Pre-procedure anxiety (measured by self-rated sleep quality before the procedure).
  - 46 • Overall satisfaction with bowel preparation.
  - 47 • Willingness to take another colonoscopy if indicated.
- 48  
49  
50  
51  
52

### 53 **Sample size calculation**

54 The sample size estimation was based on the test of 2 independent proportions with a  
55 2-sided  $\alpha=0.05$  and a power probability of 90% ( $\beta=0.1$ ). The rate of adequate  
56 preparation (a score  $\geq 2$  for all regions) in the control group is 70%[24], and we  
57 assumed an increase of 15% for the VR Group. We calculated that at least 161  
58 evaluable patients would be required per group for the study to achieve this power.  
59  
60

### Data collection

Data collection will be performed by using a standardized case report form during the appointment and on the day of colonoscopy.

### Descriptive statistics

For categorical data, frequencies will be presented. Quantitative data will be presented as the mean and standard deviation or median and interquartile range. Baseline characteristics (all prior to randomization) are: age, sex, body mass index, education level, annual personal income, living habits (including smoking, drinking and exercise), dietary habit (vegetarianism/meatatarian/balanced diet), past medical history of comorbidity (hypertension, diabetes mellitus, bronchitis, asthma, congestive heart failure, chronic renal failure, coronary artery disease, IBD, malignancy), symptoms (chronic diarrhea, constipation, mucous stool or bloody stool), family history of colorectal cancer or specific inherited syndromes.

### Analyses

All data will be analyzed according to the intention-to-treat approach in which all randomized patients are included. Occurrences of the primary and secondary endpoints are compared between the two groups. Results are presented as difference in two proportions. A two-tailed  $P < 0.05$  is considered statistically significant.

### Trial Mangement

A steering committee will manage the trial. Screening and recruitment will be reviewed at monthly meetings. An independent data and safety monitoring committee (DSMC) will meet regularly to ensure patient safety and data quality. DSMC will verify all primary and secondary endpoints as well as at least 10% of data in case report forms against on-site source data. Discrepancies detected by the committee will be resolved through a consensus by two investigators unaware of the study group assignment and not involved in patient care. Relevant clinical and radiological data submitted to the steering committee will facilitate duplicate blinded outcome adjudication.

### Termination of the trial

An interim-analysis will be conducted on the primary endpoint when 25%, 50%, and 75% of patients have been enrolled. The interim-analysis is performed by an independent statistician, blinded for the treatment allocation. The statistician will report to the independent DSMC. The DSMC will have unrestricted access to all data and will discuss the results of the intention-to-treat analysis with the steering committee in a joint meeting. The steering committee decides on the continuation of the trial and will report to the central ethics committee. The Peto approach is used to terminate the trial when the intervention group has a significant benefit from the addition of VR to the patient education methods using symmetric stopping boundaries at  $P < 0.001$ . The trial will not be stopped in case of futility unless the DSMC during

1  
2  
3 safety monitoring advises otherwise. In this case, DSMC will discuss potential  
4 stopping for futility with the trial steering committee.  
5  
6

### 7 **Safety**

8 The DSMC will monitor the progress of the trial by examining safety variables  
9 quarterly. This evaluation is based on unblinded data, in the presence of the study  
10 coordinator when DSMC requires details of the study. After the full explanation of  
11 the data is presented, the study coordinator is dismissed, and the DSMC discusses the  
12 consequences of the data presented. Adverse events are defined as "any undesirable  
13 experience occurring to a subject during a clinical trial, whether or not considered  
14 related to the intervention," such as a sense of dizziness after watching VR videos. All  
15 participating physicians will be asked to report any potential adverse events. These  
16 adverse events will be listed and discussed with the DSMC. The outcome of the  
17 meeting of the DSMC will be discussed with the trial steering committee. The  
18 outcome will also be sent to our hospital institutional review board (IRB). The DSMC  
19 will evaluate the data of the deceased patients for the cause of death, and possible trial  
20 related severe adverse events.  
21  
22  
23  
24  
25

### 26 **Patients and Public Involvement**

27 Patients or public were not involved in the trial design.  
28  
29  
30

### 31 **Discussions**

32  
33 The trial is aimed to explore whether VR videos can improve the bowel preparation  
34 quality through increasing patient adherence and experience, reduce pre-procedure  
35 anxiety, compared with the conventional patient education methods. To date, there  
36 have been several studies demonstrating that extensive patient education methods  
37 [7-18] are effective in enhancing the bowel preparation quality. However, there is a  
38 lack of evidence on the effect of VR videos, a novel technology which can arouse  
39 patients' interests and motivation. Compared with conventional video, VR videos can  
40 provide patients with immersive experiences simulating the process of bowel  
41 preparation and colonoscopy. The sense of immersion provided by VR videos is  
42 believed to be able to reduce the attention distracted by surroundings, which is proved  
43 by the fact that VR is used in chronic pain control [25]. Thus, it is likely that VR  
44 videos can make patients more concentrated in the education and enhance the effect  
45 of patient education before colonoscopy, leading to better results of the procedure.  
46  
47  
48  
49  
50  
51

### 52 **Ethics and Dissemination**

53  
54 We will conduct the study following the declaration of Helsinki. The IRB of the  
55 Peking Union Medical College Hospital approved the protocol on the 24<sup>th</sup> of July 2018  
56 (No. ZS-1647). We will obtain Informed consent from each participating patient in  
57 oral and written form before randomization. We will disseminate our results to the  
58 medical circle and will publish our results via open access.  
59  
60

## Trial Status

We registered this trial in the ClinicalTrials on 20 August 2018 with identification number NCT03667911. The first patient was randomized on the 15th of September 2018. To date, 62 patients have been randomized, and enrollment is on schedule.

## Reference

1. Johnson DA, Barkun AN, Cohen LB, et al. Optimizing adequacy of bowel cleansing for colonoscopy: recommendations from the U.S. multi-society task force on colorectal cancer. *Gastrointest Endosc* 2014, 80:543.
2. ASGE Standards of Practice Committee, Saltzman JR, Cash BD, et al. Bowel preparation before colonoscopy. *Gastrointest Endosc* 2015, 81:781.
3. Pontone S, Hassan C, Maselli R, et al. Multiple, zonal and multi-zone adenoma detection rates according to quality of cleansing during colonoscopy. *United European Gastroenterology Journal*, 2016, 4(6):778–783.
4. Woo DH, Kim KO, Jeong DE, et al. Prospective analysis of factors associated with inadequate bowel preparation for colonoscopy in actual clinical practice. *Intestinal Research*, 2018, 16(2):293–298.
5. Nguyen DL, Wieland M. Risk factors predictive of poor quality preparation during average risk colonoscopy screening: the importance of health literacy. *J Gastrointest Liver Dis* 2010; 19:369–72.
6. Rosenfeld G, Krygier D, Enns R, et al. The impact of patient education on the quality of inpatient bowel preparation for colonoscopy[J]. *Canadian Journal of Gastroenterology & Hepatology*, 2010, 24(9):543-546.
7. Spiegel BMR, Talley J, Shekelle P, et al. Development and validation of a novel patient educational booklet to enhance colonoscopy preparation. *The American Journal of Gastroenterology*, 2011,106(5):875–883.
8. Liu X, Luo H, Zhang L, et al. Telephone-based re-education on the day before colonoscopy improves the quality of bowel preparation and the polyp detection rate: a prospective, colonoscopist-blinded, randomised, controlled study. *Gut*, 2013, 63(1):125–130.
9. Sondhi AR, Kurlander JE, Waljee AK, Saini SD. A telephone-based education program improves bowel preparation quality in patients undergoing outpatient colonoscopy. *Gastroenterology*, 2015,148(3):657–658.
10. Park J, Kim TO, Lee NY, et al. The Effectiveness of Short Message Service to Assure the Preparation-to-Colonoscopy Interval before Bowel Preparation for Colonoscopy. *Gastroenterology Research and Practice*, 2015, 2015(7):628049–8.
11. Walter B, Klare P, Strehle K, et al. Improving the quality and acceptance of colonoscopy preparation by reinforced patient education with short message service: results from a randomized, multicenter study (PERICLES-II). *Gastrointestinal Endoscopy*, 2018.



12. Lorenzo-Zúñiga V, Moreno de Vega V, Marín I, Barberá M, Boix J. Improving the quality of colonoscopy bowel preparation using a smart phone application: a randomized trial. *Digestive Endoscopy : Official Journal of the Japan Gastroenterological Endoscopy Society*, 2015, 27(5):590–595.
13. Cho J, Lee S, Shin JA, Kim JH, Lee HS. The Impact of Patient Education with a Smartphone Application on the Quality of Bowel Preparation for Screening Colonoscopy. *Clinical Endoscopy*, 2017, 50(5):479–485.
14. Wang SL, Wang Q, Yao J, et al. Effect of WeChat and short message service on bowel preparation: an endoscopist-blinded, randomized controlled trial. *European Journal of Gastroenterology & Hepatology*, 2018:1.
15. Garg S, Girotra M, Chandra L, et al. Improved Bowel Preparation with Multimedia Education in a Predominantly African-American Population: A Randomized Study. *Diagnostic and Therapeutic Endoscopy*, 2016, 2016(12):2072401–7.
16. Park JS, Kim MS, Kim H, et al. A randomized controlled trial of an educational video to improve quality of bowel preparation for colonoscopy. *BMC Gastroenterology*, 2016, 16(1):64.
17. Back SY, Kim HG, Ahn EM, et al. Impact of patient audiovisual re-education via a smartphone on the quality of bowel preparation before colonoscopy: a single-blinded randomized study. *Gastrointestinal Endoscopy*, 2018, 87(3):789–799.e4.
18. Pillai A, Menon R, Ousteky D, & Ahmad A. Educational Colonoscopy Video Enhances Bowel Preparation Quality and Comprehension in an Inner City Population. *Journal of Clinical Gastroenterology*, 2018, 52(6):515–518.
19. Serper M, Gawron AJ, Smith SG, et al. Patient Factors that Affect Quality of Colonoscopy Preparation[J]. *Clinical Gastroenterology & Hepatology the Official Clinical Practice Journal of the American Gastroenterological Association*, 2014, 12(3):451-457.
20. Yang C, Sriranjana V, Abou-Setta AM, Poluha W, Walker JR, & Singh H. Anxiety Associated with Colonoscopy and Flexible Sigmoidoscopy: A Systematic Review. *The American Journal of Gastroenterology*, 2018, 59(6 Pt 1):366.
21. Wolf AM, Fontham ET, Church TR, et al. Colorectal cancer screening for average-risk adults: 2018 guideline update from the American Cancer Society[J]. *CA: A Cancer Journal for Clinicians*, 2018, 68(4):250-281.
22. Rex DK, Schoenfeld PS, Cohen J, et al. Quality indicators for colonoscopy[J]. *American Journal of Gastroenterology*, 2015, 81(1):31-53.
23. Johnson DA, Barkun AN, Cohen LB, et al. Optimizing adequacy of bowel cleansing for colonoscopy: recommendations from the U.S. Multi-Society Task Force on Colorectal Cancer[J]. *Gastroenterology*, 2014, 80(4):543-562.
24. Back SY, Kim HG, Ahn EM, et al. Impact of patient audio-visual re-education through a smartphone on quality of bowel preparation before colonoscopy; a single-blinded randomized study[J]. *Gastrointestinal Endoscopy*, 2017:S0016510717322691.

1  
2  
3 25. Gupta A, Scott K, Dukewich M, et al. Innovative Technology Using Virtual  
4 Reality in the Treatment of Pain: Does It Reduce Pain via Distraction, or Is There  
5 More to It?[J]. Pain Medicine, 2018, 19(1): 151-159.  
6  
7

### 8 **Authors' contributions**

9  
10 ZY is responsible for designing the trial, drafting the protocol, reviewing and final  
11 approval.

12 XF contributes to improving the methodology of this trial.

13 BX contributes to the design and reviewing the protocol.

14 YA contributes to the design and managing this trial.

15  
16 WD is the corresponding author, responsible for designing and managing the trial,  
17 drafting the protocol, reviewing and final approval.  
18  
19

### 20 **Funding Statement**

21  
22 This research received no specific grant from any funding agency in public,  
23 commercial or not-for-profit sectors.  
24  
25

### 26 **Competing interests statement**

27  
28 None.  
29  
30  
31  
32  
33  
34  
35  
36  
37  
38  
39  
40  
41  
42  
43  
44  
45  
46  
47  
48  
49  
50  
51  
52  
53  
54  
55  
56  
57  
58  
59  
60

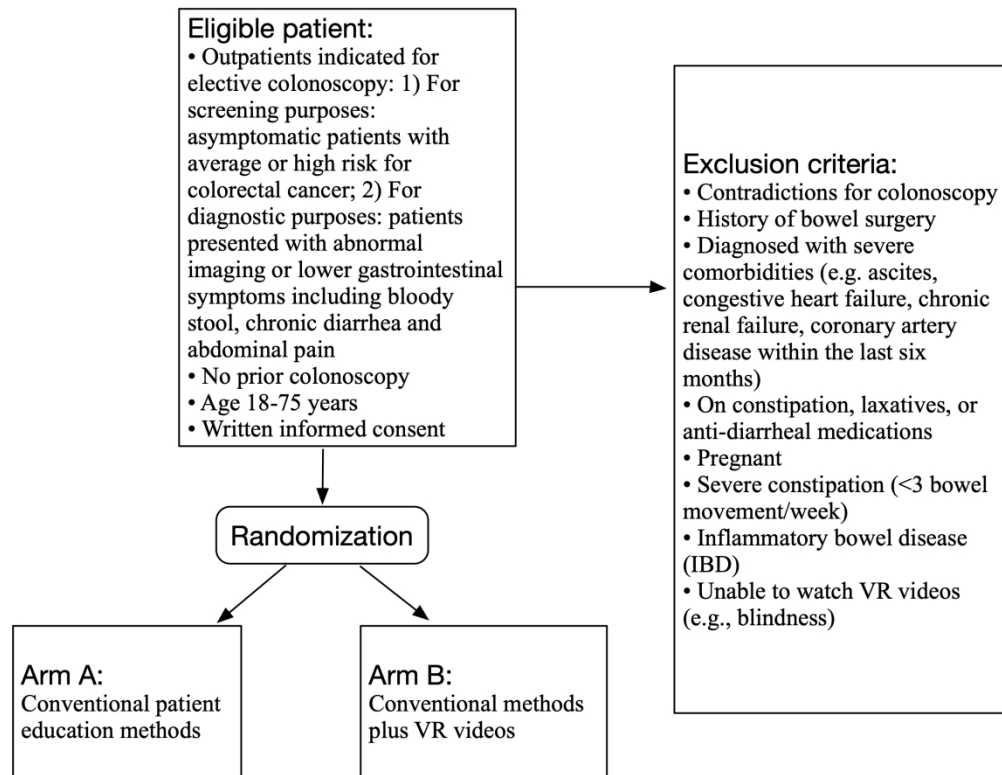

Figure 1. Trial design.

207x159mm (300 x 300 DPI)

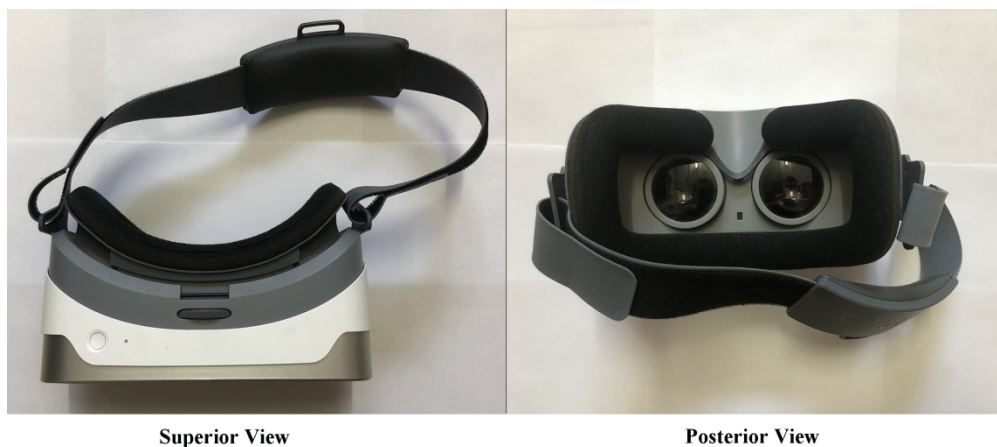

**Superior View**

**Posterior View**

Figure 2. Head-mounted display for virtual reality videos.

199x90mm (300 x 300 DPI)

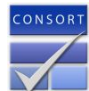

## CONSORT 2010 checklist of information to include when reporting a randomised trial\*

| Section/Topic                    | Item No | Checklist item                                                                                                                                                                              | Reported on page No |
|----------------------------------|---------|---------------------------------------------------------------------------------------------------------------------------------------------------------------------------------------------|---------------------|
| <b>Title and abstract</b>        |         |                                                                                                                                                                                             |                     |
|                                  | 1a      | Identification as a randomised trial in the title                                                                                                                                           | 1                   |
|                                  | 1b      | Structured summary of trial design, methods, results, and conclusions (for specific guidance see CONSORT for abstracts)                                                                     | 2                   |
| <b>Introduction</b>              |         |                                                                                                                                                                                             |                     |
| Background and objectives        | 2a      | Scientific background and explanation of rationale                                                                                                                                          | 3                   |
|                                  | 2b      | Specific objectives or hypotheses                                                                                                                                                           | 3                   |
| <b>Methods</b>                   |         |                                                                                                                                                                                             |                     |
| Trial design                     | 3a      | Description of trial design (such as parallel, factorial) including allocation ratio                                                                                                        | 3                   |
|                                  | 3b      | Important changes to methods after trial commencement (such as eligibility criteria), with reasons                                                                                          | N/A                 |
| Participants                     | 4a      | Eligibility criteria for participants                                                                                                                                                       | 4                   |
|                                  | 4b      | Settings and locations where the data were collected                                                                                                                                        | 6                   |
| Interventions                    | 5       | The interventions for each group with sufficient details to allow replication, including how and when they were actually administered                                                       | 4-5                 |
| Outcomes                         | 6a      | Completely defined pre-specified primary and secondary outcome measures, including how and when they were assessed                                                                          | 5                   |
|                                  | 6b      | Any changes to trial outcomes after the trial commenced, with reasons                                                                                                                       | N/A                 |
| Sample size                      | 7a      | How sample size was determined                                                                                                                                                              | 5                   |
|                                  | 7b      | When applicable, explanation of any interim analyses and stopping guidelines                                                                                                                | 6                   |
| <b>Randomisation:</b>            |         |                                                                                                                                                                                             |                     |
| Sequence generation              | 8a      | Method used to generate the random allocation sequence                                                                                                                                      | 4                   |
|                                  | 8b      | Type of randomisation; details of any restriction (such as blocking and block size)                                                                                                         | 4                   |
| Allocation concealment mechanism | 9       | Mechanism used to implement the random allocation sequence (such as sequentially numbered containers), describing any steps taken to conceal the sequence until interventions were assigned | 4                   |
| Implementation                   | 10      | Who generated the random allocation sequence, who enrolled participants, and who assigned participants to interventions                                                                     | 4                   |
| Blinding                         | 11a     | If done, who was blinded after assignment to interventions (for example, participants, care providers, those                                                                                | 4                   |

|                                                      |     |                                                                                                                                                   |     |
|------------------------------------------------------|-----|---------------------------------------------------------------------------------------------------------------------------------------------------|-----|
|                                                      |     | assessing outcomes) and how                                                                                                                       |     |
|                                                      | 11b | If relevant, description of the similarity of interventions                                                                                       | N/A |
| Statistical methods                                  | 12a | Statistical methods used to compare groups for primary and secondary outcomes                                                                     | N/A |
|                                                      | 12b | Methods for additional analyses, such as subgroup analyses and adjusted analyses                                                                  | N/A |
| <b>Results</b>                                       |     |                                                                                                                                                   |     |
| Participant flow (a diagram is strongly recommended) | 13a | For each group, the numbers of participants who were randomly assigned, received intended treatment, and were analysed for the primary outcome    | N/A |
|                                                      | 13b | For each group, losses and exclusions after randomisation, together with reasons                                                                  | N/A |
| Recruitment                                          | 14a | Dates defining the periods of recruitment and follow-up                                                                                           | N/A |
|                                                      | 14b | Why the trial ended or was stopped                                                                                                                | N/A |
| Baseline data                                        | 15  | A table showing baseline demographic and clinical characteristics for each group                                                                  | N/A |
| Numbers analysed                                     | 16  | For each group, number of participants (denominator) included in each analysis and whether the analysis was by original assigned groups           | N/A |
| Outcomes and estimation                              | 17a | For each primary and secondary outcome, results for each group, and the estimated effect size and its precision (such as 95% confidence interval) | N/A |
|                                                      | 17b | For binary outcomes, presentation of both absolute and relative effect sizes is recommended                                                       | N/A |
| Ancillary analyses                                   | 18  | Results of any other analyses performed, including subgroup analyses and adjusted analyses, distinguishing pre-specified from exploratory         | N/A |
| Harms                                                | 19  | All important harms or unintended effects in each group (for specific guidance see CONSORT for harms)                                             | N/A |
| <b>Discussion</b>                                    |     |                                                                                                                                                   |     |
| Limitations                                          | 20  | Trial limitations, addressing sources of potential bias, imprecision, and, if relevant, multiplicity of analyses                                  | 7   |
| Generalisability                                     | 21  | Generalisability (external validity, applicability) of the trial findings                                                                         | N/A |
| Interpretation                                       | 22  | Interpretation consistent with results, balancing benefits and harms, and considering other relevant evidence                                     | N/A |
| <b>Other information</b>                             |     |                                                                                                                                                   |     |
| Registration                                         | 23  | Registration number and name of trial registry                                                                                                    | 8   |
| Protocol                                             | 24  | Where the full trial protocol can be accessed, if available                                                                                       | N/A |
| Funding                                              | 25  | Sources of funding and other support (such as supply of drugs), role of funders                                                                   | 10  |

\*We strongly recommend reading this statement in conjunction with the CONSORT 2010 Explanation and Elaboration for important clarifications on all the items. If relevant, we also recommend reading CONSORT extensions for cluster randomised trials, non-inferiority and equivalence trials, non-pharmacological treatments, herbal interventions, and pragmatic trials. Additional extensions are forthcoming; for those and for up to date references relevant to this checklist, see [www.consort-statement.org](http://www.consort-statement.org).
